# Supplementary material for: Engineering peptide-modified alginate-based bioinks with cell-adhesive properties for biofabrication
Source: Royal Society of Chemistry journal article supplement (doi:10.1039/d3ra08394b), 2024-01-01
Supplement: d3ra08394b1.pdf [file d3ra08394b1.pdf]

## Appendix

**Tab.S1:** List of investigated bioinks with detailed information about their composition.

| Bioink label       | Composition information                                                |
|--------------------|------------------------------------------------------------------------|
| PeptideA           | Peptide sequence YIGSR (C-GG-YIGSR-NH <sub>2</sub> )                   |
| PeptideB           | Peptide sequence RRETEWA (C-GG-RRETEWA-NH <sub>2</sub> )               |
| PeptideC           | Peptide sequence IKVAV (C-GG-IKVAV-NH <sub>2</sub> )                   |
| PeptideABC         | Peptide combination: YIGSR, RRETEWA and IKVAV                          |
| ALG                | Pure alginate PH163S2                                                  |
| ALG-Carbodiimide   | Pure alginate treated with the conditions of the carbodiimide reaction |
| ADA-Carbodiimide   | Pure ADA treated with the conditions of the carbodiimide reaction      |
| ALG-PeptideA       | Alginate substituted with PeptideA via carbodiimide reaction           |
| ALG-PeptideB       | Alginate substituted with PeptideB via carbodiimide reaction           |
| ALG-PeptideC       | Alginate substituted with PeptideC via carbodiimide reaction           |
| ALG-PeptideABC     | Alginate substituted with PeptideABC via carbodiimide reaction         |
| ADA                | Oxidized alginate                                                      |
| ADA-PeptideA       | ADA substituted with PeptideA via carbodiimide reaction                |
| ADA-PeptideB       | ADA substituted with PeptideB via carbodiimide reaction                |
| ADA-PeptideC       | ADA substituted with PeptideC via carbodiimide reaction                |
| ADA-PeptideABC     | ADA substituted with PeptideABC via carbodiimide reaction              |
| ADA+PeptideA       | ADA substituted with PeptideA via Schiff base reaction                 |
| ADA+PeptideB       | ADA substituted with PeptideB via Schiff base reaction                 |
| ADA+PeptideC       | ADA substituted with PeptideC via Schiff base reaction                 |
| ADA+PeptideABC     | ADA substituted with PeptideABC via Schiff base reaction               |
| PEG-PeptideA       | PEG-MAL substituted with PeptideA via Michael addition                 |
| PEG-PeptideB       | PEG-MAL substituted with PeptideB via Michael addition                 |
| PEG-PeptideC       | PEG-MAL substituted with PeptideC via Michael addition                 |
| PEG-PeptideABC     | PEG-MAL substituted with PeptideABC via Michael addition               |
| ADA+PEG-PeptideA   | ADA substituted with PEG-PeptideA via Schiff base reaction             |
| ADA+PEG-PeptideB   | ADA substituted with PEG-PeptideB via Schiff base reaction             |
| ADA+PEG-PeptideC   | ADA substituted with PEG-PeptideC via Schiff base reaction             |
| ADA+PEG-PeptideABC | ADA substituted with PEG-PeptideABC via Schiff base reaction           |

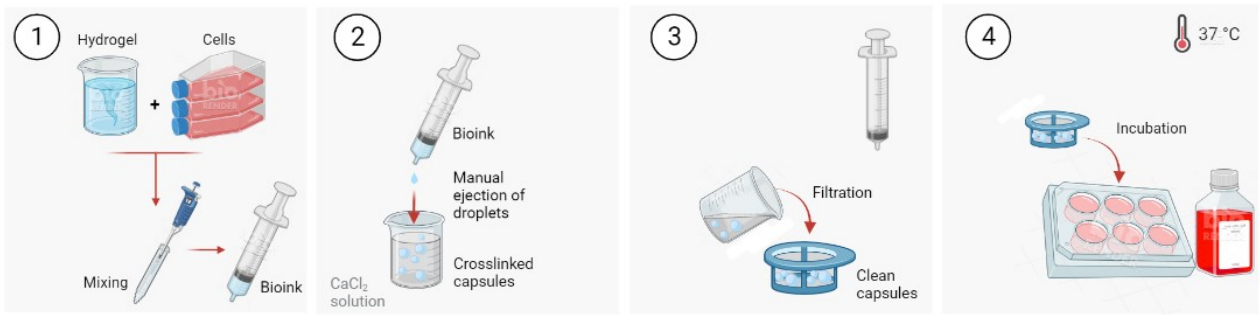

**Fig. S1:** Step by step procedure of manually fabricating hydrogel capsules by mixing cells into the hydrogel (step 1), ejecting the hydrogel into a  $\text{CaCl}_2$  crosslinker bath using a syringe (step 2), followed by filtration using a cell strainer (step 3) and incubation in DMEM (step 4).

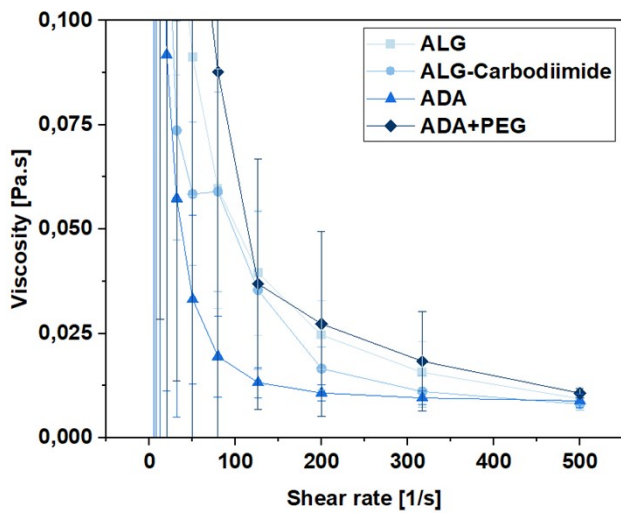

**Fig. S2:** Viscosity of ALG, ALG-Carbodiimide, ADA and ADA+PEG determined by rheological analysis after crosslinking (for the viscosity region 0 - 0,1 Pa.s).

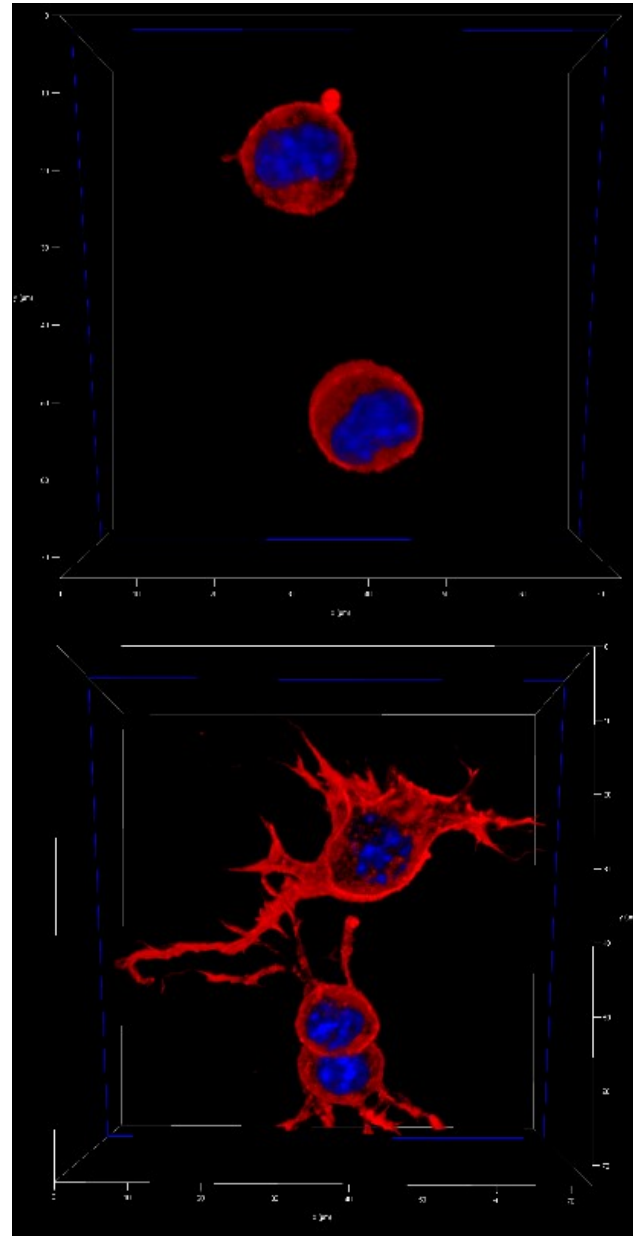

**Fig. S3:** Confocal images of NIH/3T3 cells grown in ALG (above) and ADA+PEG-PeptideA (below) bioinks after 7 d of incubation. Blue: DAPI, red: Phalloidin-Rhodamine. MIP. 40x/1.1 W objective at zoom

4, Z-stack with step size of 0.5  $\mu\text{m}$ . Images taken using the Leica Stellaris 5 system performed by Heike Glauner, Leica Germany.
